# Supplementary material for: New d10metal–organic coordination polymers with 9,10-bis(triazol-1-ylmethyl)anthracene (L): Syntheses, crystal structures, and luminescent properties
Source: Royal Society of Chemistry journal article supplement (doi:10.1039/b618015a), 2007-01-01
Supplement: b618015a.pdf [file b618015a.pdf]

# New $d^{10}$ Metal-Organic Coordination Polymers with 9,10-Bis(triazol-1-ylmethyl)anthracene (L): Synthesis, Crystal Structures, and Luminescent Properties

Duo-Zhi Wang, Chun-Sen Liu, Jian-Rong Li, Lei Li, Yong-Fei Zeng and Xian-He  
Bu\*

## TG-DTA for 1~6

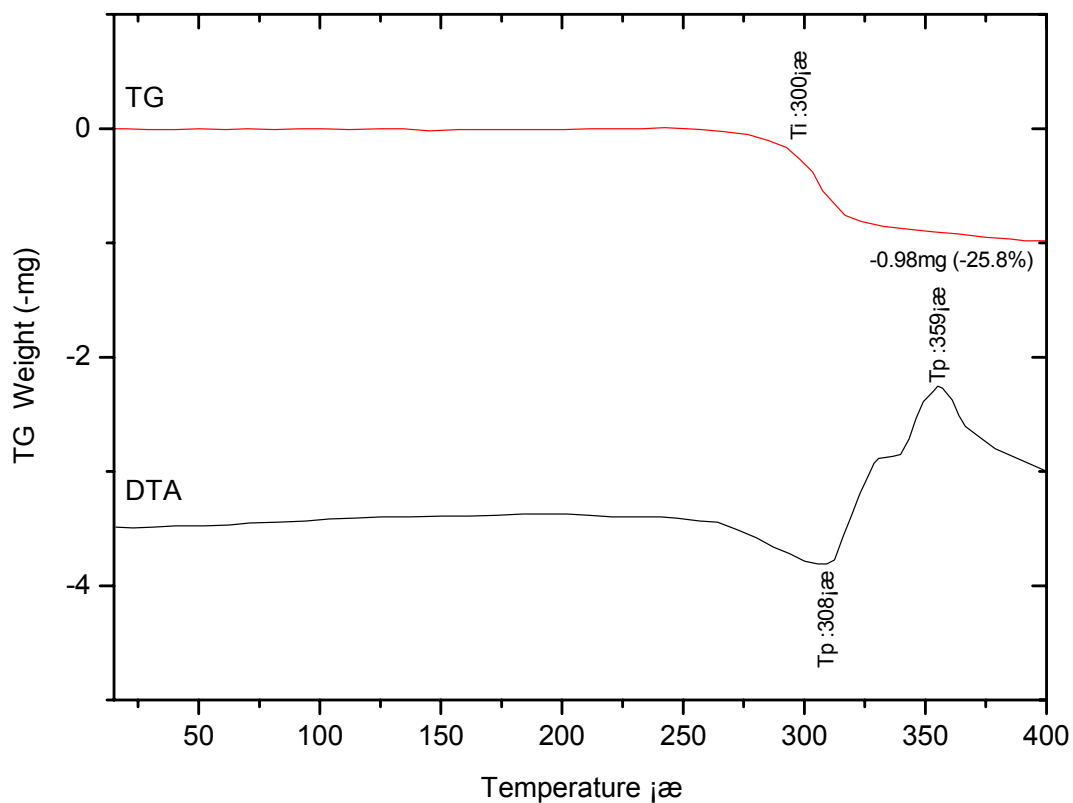

Fig. S1. TG-DTA for 1.

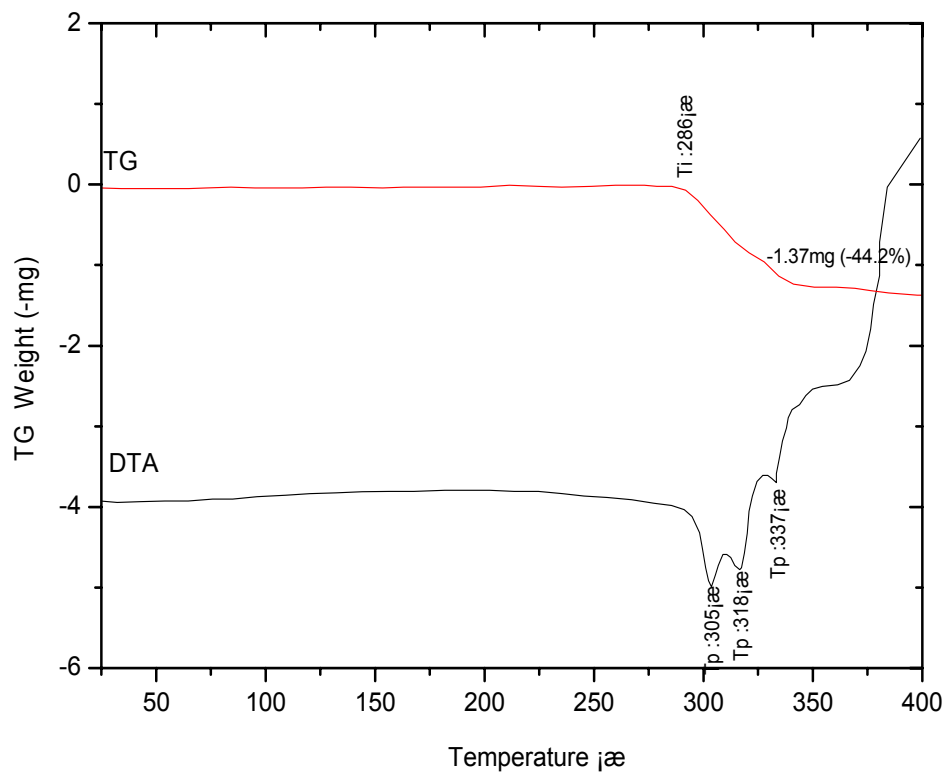

Fig. S2. TG-DTA for 2.

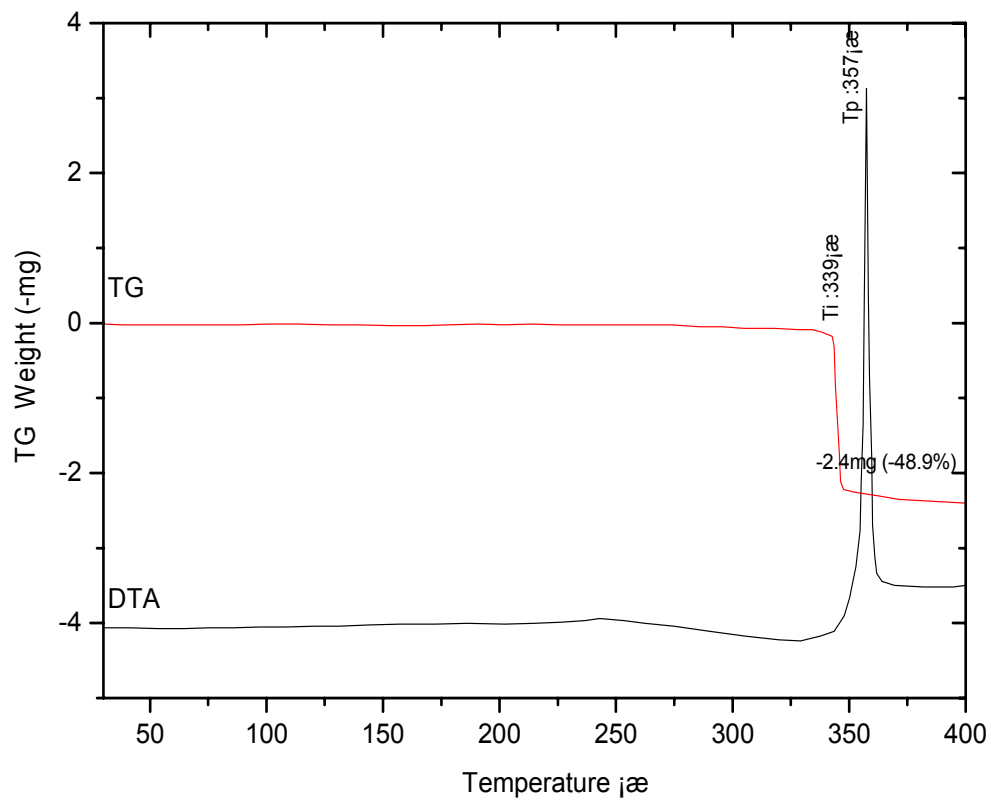

Fig. S3. TG-DTA for 3.

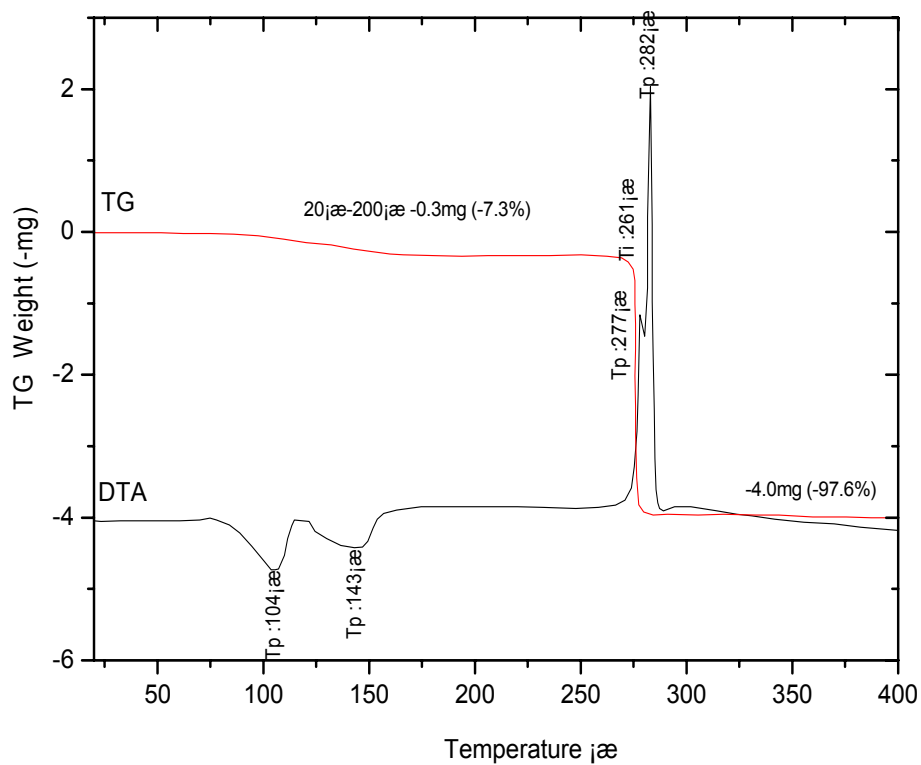

Fig. S4. TG-DTA for 4.

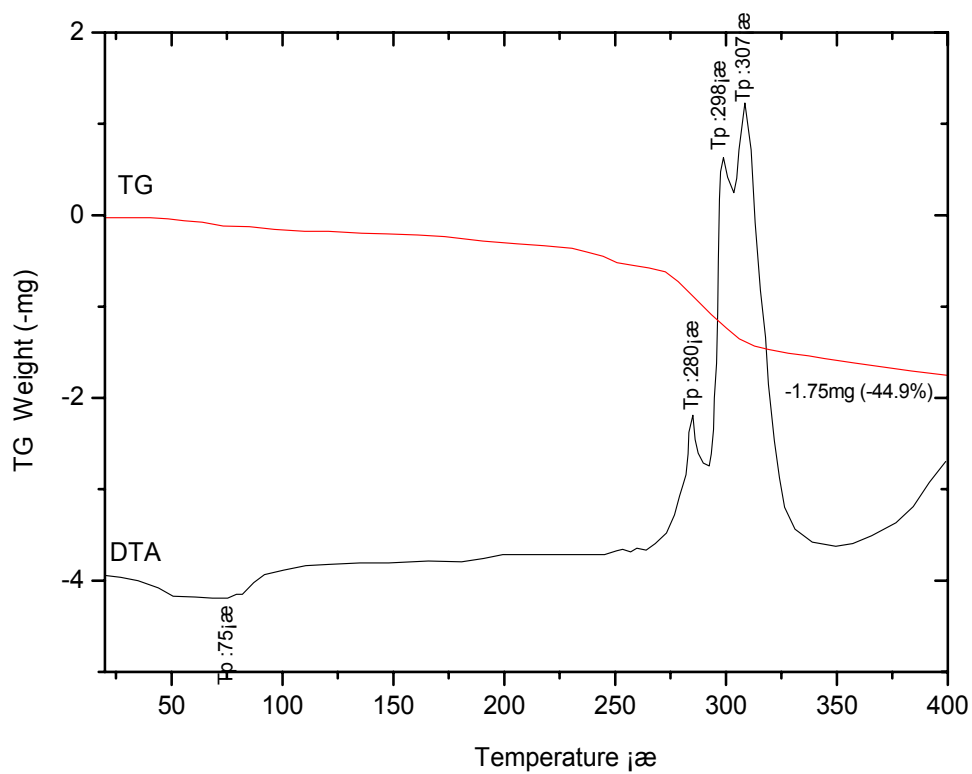

Fig. S5. TG-DTA for 5.

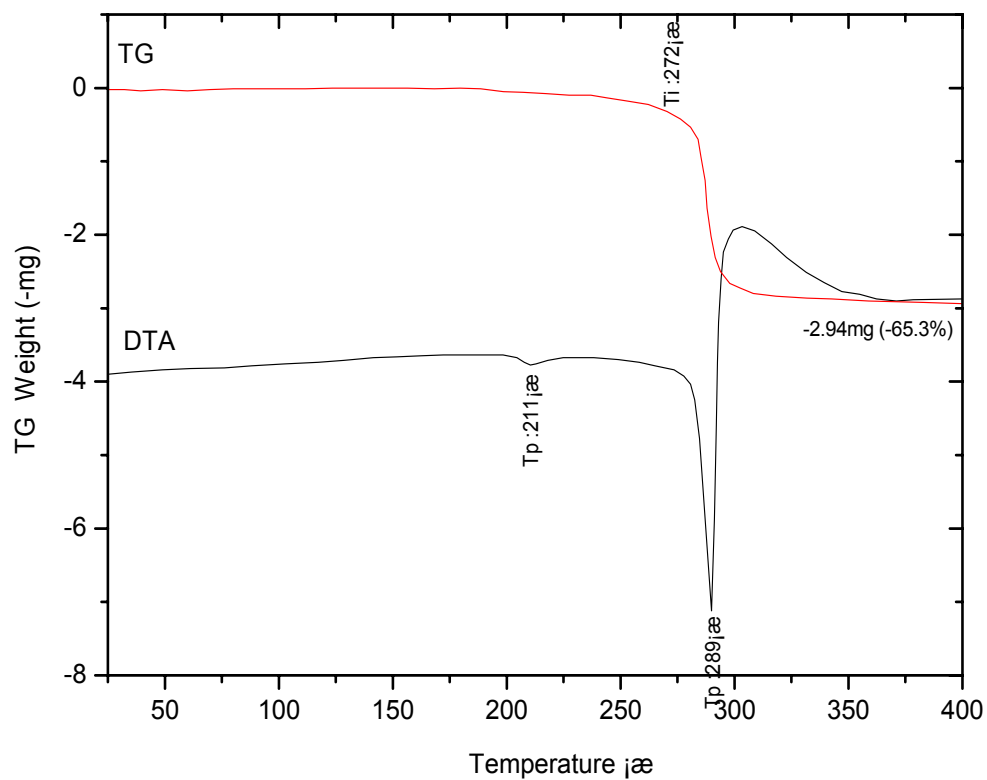

**Fig. S6.** TG-DTA for 6.
